1           **Comparison of COVID-19 outcomes among shielded and non-shielded populations:**  
2                           **A general population cohort study of 1.3 million**

3  
4  
5  
6   Bhautesh D Jani<sup>†</sup>, Frederick K Ho<sup>†</sup>, David J Lowe, Jamie P Traynor, Sean MacBride-Stewart,  
7   Patrick B Mark, Frances S Mair, Jill P Pell\*

8  
9   <sup>†</sup>Joint-first author

10  
11   Bhautesh D Jani PhD  
12   Clinical Senior Lecturer in General Practice and Primary Care  
13   Institute of Health and Wellbeing, University of Glasgow  
14   Glasgow G12 9LX, UK  
15   [Bhautesh.jani@glasgow.ac.uk](mailto:Bhautesh.jani@glasgow.ac.uk)

16  
17   Frederick K Ho PhD  
18   Research Associate  
19   Institute of Health and Wellbeing, University of Glasgow  
20   Glasgow, G12 8RZ, UK  
21   [Frederick.Ho@glasgow.ac.uk](mailto:Frederick.Ho@glasgow.ac.uk)

22  
23   David J Lowe MSc  
24   Consultant in Emergency Medicine  
25   Queen Elizabeth University Hospital, NHS Greater Glasgow and Clyde  
26   Glasgow, G52 4TF, UK  
27   [David.lowe@nhs.net](mailto:David.lowe@nhs.net)

28  
29   Jamie P Traynor MD  
30   Consultant Nephrologist  
31   Queen Elizabeth University Hospital, NHS Greater Glasgow and Clyde  
32   Glasgow, G52 4TF, UK  
33   [Jamie.traynor@ggc.scot.nhs.uk](mailto:Jamie.traynor@ggc.scot.nhs.uk)

34  
35   Sean MacBride-Stewart PhD  
36   Lead Pharmacist (Medicines Management Resources)  
37   Pharmacy Services, NHS Greater Glasgow and Clyde  
38   Glasgow, G76 7AT, UK  
39   [Sean.MacBride-Stewart@ggc.scot.nhs.uk](mailto:Sean.MacBride-Stewart@ggc.scot.nhs.uk)

40  
41   Patrick B Mark PhD  
42   Professor of Nephrology  
43   Institute of Cardiovascular and Medical Sciences, University of Glasgow  
44   Glasgow, G12 8TA, UK  
45   [Patrick.Mark@glasgow.ac.uk](mailto:Patrick.Mark@glasgow.ac.uk)

46  
47   Frances S Mair MD  
48   Norie Miller Professor of General Practice  
49   Institute of Health and Wellbeing, University of Glasgow  
50   Glasgow G12 9LX, UK

1 [Frances.mair@glasgow.ac.uk](mailto:Frances.mair@glasgow.ac.uk)  
2  
3 Jill P Pell MD  
4 Henry Mechan Professor of Public Health  
5 Institute of Health and Wellbeing, University of Glasgow  
6 Glasgow, G12 8RZ, UK  
7 [Jill.pell@glasgow.ac.uk](mailto:Jill.pell@glasgow.ac.uk)

8  
9

10

11 **\*Address for correspondence:**

12 Professor Jill Pell  
13 Director of the Institute of Health and Wellbeing  
14 University of Glasgow  
15 1 Lilybank Gardens  
16 Glasgow G12 8RZ  
17 United Kingdom  
18 [Jill.pell@glasgow.ac.uk](mailto:Jill.pell@glasgow.ac.uk)

19

20

|    |                       |       |
|----|-----------------------|-------|
| 21 | Abstract word count   | 200   |
| 22 | Main text word count  | 2,964 |
| 23 | Tables                | 5     |
| 24 | Supplementary Tables  | 2     |
| 25 | Supplementary Figures | 1     |
| 26 | Number of references  | 34    |

27

1 **Abstract**

2 Many western countries used shielding (extended self-isolation) of people presumed to be at  
3 high-risk from COVID-19 to protect them and reduce healthcare demand. To investigate the  
4 effectiveness of this strategy, we linked family practitioner, prescribing, laboratory, hospital  
5 and death records and compared COVID-19 outcomes among shielded and non-shielded  
6 individuals in the West of Scotland. Of the 1.3 million population, 27,747 (2.03%) were  
7 advised to shield, and 353,085 (26.85%) were classified a priori as moderate risk. COVID-19  
8 testing was more common in the shielded (7.01%) and moderate risk (2.03%) groups, than  
9 low risk (0.73%). Referent to low-risk, the shielded group had higher confirmed infections  
10 (RR 8.45, 95% CI 7.44-9.59), case-fatality (RR 5.62, 95% CI 4.47-7.07) and population  
11 mortality (RR 57.56, 95% CI 44.06-75.19). The moderate-risk had intermediate confirmed  
12 infections (RR 4.11, 95% CI 3.82-4.42) and population mortality (RR 25.41, 95% CI 20.36-  
13 31.71) but, due to their higher prevalence, made the largest contribution to deaths (PAF  
14 75.30%). Age  $\geq 70$  years accounted for 49.55% of deaths. In conclusion, shielding has not  
15 been effective at preventing deaths in individuals at high risk. Also, to be effective as a  
16 population strategy, shielding criteria would need to be widely expanded to include other  
17 criteria, such as the elderly.

18

19 **Keywords (Mesh terms):**

20 Cohort studies; COVID-19; epidemiology; vulnerable populations

21

22

## 1 **Introduction**

2

3 Early in the COVID-19 pandemic, a major concern was that the demand on health services  
4 would exceed capacity in terms of hospitalisations, intensive care unit (ICU) admissions, and  
5 ventilation <sup>1</sup>. It was assumed that sub-groups of the population would have worse prognosis  
6 and, therefore, contribute disproportionately to adverse outcomes and healthcare demands.

7

8 Asian countries generally relied on population-wide strategies <sup>2</sup>. Early, widespread ‘test,  
9 trace, isolate’ strategies were made possible by higher testing capacity and greater  
10 willingness to monitor and enforce compliance. In contrast, Europe and the USA adopted a  
11 two-pronged approach; <sup>2</sup> general population interventions, such as physical distancing and  
12 hand hygiene, designed to reduce transmission in the population as a whole, supplemented by  
13 shielding of those assumed to be at higher risk. Notably, Sweden, an outlier in not applying  
14 lock-down, nonetheless mandated shielding<sup>3</sup>.

15

16 In the UK, a Vulnerable Patient List (Supplementary Table 1)<sup>6</sup> was produced comprising two  
17 categories labelled high risk, highest risk or clinically extremely vulnerable and moderate  
18 risk, at risk or clinically vulnerable by various UK organisations. In this manuscript, they are  
19 referred to as shielded and moderate risk respectively, with the remaining population labelled  
20 low-risk. In the UK, the shielded group received individual letters strongly recommending  
21 they self-isolate over a protracted period - not leaving their homes and avoiding non-essential  
22 contact with household members - and were provided with support at home such as delivery  
23 of food packages. The moderate risk category was simply advised to be vigilant in adhering  
24 to general advice.

25

1 The category definitions were based largely on expert opinion informed by our understanding  
2 of previous viruses and the need for better definitions has been highlighted <sup>7</sup>. Studies are  
3 emerging of the risk factors associated with COVID-19 outcomes. Among two million UK  
4 community-based app users self-reported heart disease, kidney disease, lung disease, diabetes  
5 and obesity were associated with self-reported hospital admission and respiratory support for  
6 COVID-19 <sup>8</sup>. Similarly, linkage of family practitioner records of 17 million people in  
7 England reported a wide range of long-term conditions associated with in-hospital death from  
8 COVID-19 including: respiratory, heart, liver and kidney disease, diabetes, cancers, stroke  
9 and organ transplantation <sup>9</sup>. Unfortunately, the investigators did not have access to deaths in  
10 the community. COVID-19 risk scores are being developed in an attempt to improve  
11 identification of high risk individuals who could be advised to shield <sup>10</sup> but attempts to  
12 investigate the potential contribution of a shielding strategy to population-level outcomes and  
13 healthcare demands have so far been limited to mathematical modelling<sup>11-19</sup>.

14  
15 The aims of this study were to compare those classified, a priori, as high risk (and therefore  
16 advised to shield) and those classified as moderate and low-risk, in terms of their individual  
17 risk of COVID-19 infection and outcomes and the extent to which they accounted for  
18 COVID-19 related outcomes at a population level.

## 21 **Results**

22  
23 Of the 1,315,071 people registered with family practitioners in NHS Greater Glasgow and  
24 Clyde in the West of Scotland, 26,747 (2.03%) were on the shielding list and 353,085  
25 (26.85%) were classified, a priori, as moderate-risk. Of the 26,747 shielded group, 18,147

1 (55.78%) had severe respiratory disease, 5,349 (16.44%) were on immunosuppressive  
2 therapies, 2,491 (7.66%) had specific cancers, 1,245 (3.83%) had received organ transplants,  
3 475 (1.78%) were on renal dialysis, and less than five were pregnant and had severe heart  
4 disease. Of the 353,085 classified as moderate-risk, 160,215 (45.38%) had hypertension,  
5 151,865 (43.01%) had chronic lung disease, 139,568 (39.53%) were  $\geq 70$  years of age, 64,358  
6 (18.23%) had diabetes, 48,571 (13.81%) had heart disease, and 1,195 (0.34%) had a  
7 weakened immune system.

8

#### 9 Shielded and moderate-risk categories

10

11 Overall, 15,865 (1.21%) people were tested for COVID-19. The likelihood of being tested  
12 increased with age, was higher in women and the moderate-risk category and highest in the  
13 shielded group (Table 1). Overall, 3,348 (0.25%) people had confirmed COVID-19 infection.  
14 The likelihood of laboratory-confirmed COVID-19 infection followed similar patterns as  
15 testing. It increased with age, was higher in women, was highest in the shielded group and  
16 lowest in the low-risk category (Table 2). After adjustment for sex and deprivation quintile,  
17 the risk of laboratory-confirmed infection remained higher in the moderate-risk category and  
18 highest in the shielded group (Table 3).

19

20 Overall, 1,661 people were hospitalised for COVID-19. Within the general population,  
21 hospitalisations increased with age but were comparable between men and women (Table 2).  
22 Hospitalisations were more common in the moderate-risk category and most common in the  
23 shielded group (Table 2), remaining so after adjustment for sex and deprivation (Table 3).  
24 Overall, 122 people were admitted to ICU wards for COVID-19. ICU admissions were  
25 significantly more common among people aged 45-64 years of age than among older people

1 (Table 2). Compared with the low-risk category, the shielded group were 18 times more  
2 likely to be hospitalised but only 4 times more likely to be admitted to ICU (Table 3).  
3 Overall, 1,027 (0.08%) people died from COVID-19. Within the general population,  
4 mortality increased with age but was similar in men and women (Table 2). Population  
5 mortality was higher in the moderate-risk category and highest in the shielded group (Table  
6 2) and remained so after adjustment for sex and deprivation (Table 3).

7

8 Among the sub-group with laboratory-confirmed (test-positive) COVID-19 infection, 1,661  
9 (49.6%) were hospitalised. Hospitalisations increased with age but were comparable between  
10 men and women (Table 4). The moderate-risk category was more likely to be hospitalised  
11 and the shielded group most likely (Table 4), remaining so after adjustment for age and  
12 deprivation (Table 5). Among those with laboratory-confirmed infection, ICU admissions  
13 were more common in men and more common in people aged 45-64 years than those older  
14 (Table 4). Low-risk cases were more likely to be admitted to ICU than the moderate-risk and  
15 shielded groups (Tables 4 & 5). Among the sub-group with clinically-confirmed (test-  
16 positive or COVID-19 related death) COVID-19 infection, 1,027 (26.70%) died (Table 4).  
17 Case-fatality increased by age and was higher in men than women. It was lowest in the low-  
18 risk category but not significantly different between the moderate-risk and shielded groups  
19 ( $RR_{\text{shielded/moderate}}$  [95% CI] 1.12 [0.96-1.31],  $p=0.14$ ) (Table 5).

20

21 The shielded group accounted for 7.62% of laboratory-confirmed COVID-19 infections,  
22 12.70% of COVID-19 hospitalisations, 2.69% of ICU admissions and 13.22% of COVID-19  
23 related deaths (Supplementary Table 2). The corresponding figures for the moderate-risk  
24 category were 42.06%, 53.28%, 22.96% and 75.30%. To prevent at least 80% of deaths,  
25 28.8% of the population would have had to receive the current level of shielding including

1 those with five criteria classified as moderate- risk at the time of the study (Supplementary  
2 Figure 1).

3

#### 4 Individual risk criteria

5

6 Due to insufficient numbers, the individual risk criteria models could not be run for pregnant  
7 women with severe heart disease or for COVID-19 related ICU admission in the shielded  
8 category. All the remaining individual risk criteria were associated with higher likelihood of  
9 being tested for COVID-19 (Table 1), laboratory-confirmed infection (Table 2),  
10 hospitalisation, population mortality (Table 3) and case-fatality (Table 5) independent of sex  
11 and deprivation. Among the moderate-risk category criteria, age  $\geq 70$  years and weakened  
12 immune system had risks of population mortality (Table 3) and case-fatality (Table 5) at least  
13 as high as the overall shielded group. Apart from the 0.13% of people with relevant rare  
14 diseases or inborn errors of metabolism and 1.78% on renal dialysis, the strongest  
15 associations were observed for those aged  $\geq 70$  years who were eight times as likely to have  
16 confirmed infection (Table 3); seven times as likely to die following confirmed infection  
17 (Table 5); and 74 times as likely to die overall (Table 3) compared with the low-risk  
18 category. Being  $\geq 70$  years of age accounted for 17.81% of confirmed COVID-19 infections,  
19 22.19% of COVID-19 related hospitalisations, and 49.55% of COVID-19 related deaths  
20 (Supplementary Table 2). Among those hospitalised for COVID-19, the likelihood of ICU  
21 admission was significantly lower for all individual risk criteria in the moderate-risk  
22 category, other than diabetes (Table 5). In particular, hospitalised patients  $\geq 70$  years of age  
23 were 14 times less likely to be admitted to ICU than low-risk hospitalised patients (Table 5).

24

#### 25 **Discussion**



1

2 The 2.03% of people advised to shield were, nonetheless, eight times more likely to have  
3 confirmed infections than the low-risk category, five times more likely to die following  
4 confirmed infection and 49 times more likely to die from COVID-19 overall. Whilst selective  
5 testing might explain the first outcome, it does not explain higher overall mortality which  
6 suggests that the shielding strategy was not as effective as was hoped.

7

8 One quarter of the population were classified as moderate-risk and not advised to shield.  
9 Nonetheless, they were four times more likely to have confirmed infections than the low-risk  
10 category, five times more likely to die following confirmed infection and 25 times more  
11 likely to die overall, suggesting that the shielding criteria should be expanded. In particular,  
12 older age needs to be considered since the elderly are both at high individual risk and  
13 contribute significantly to population burden due to their relatively high numbers.

14

15 Paradoxically, people in the shielded and moderate-risk categories were less likely to be  
16 admitted to ICU following hospitalisation for COVID-19 in spite of their poor prognosis,  
17 especially patients  $\geq 70$  years. It is uncertain whether this, in part, reflected selective  
18 admission policies applied to avoid demand exceeding supply, as happened in countries such  
19 as Italy. Nonetheless, this finding reinforces the importance of protection in those with the  
20 worst prognosis.

21

22 Our finding that 26.85% of people satisfy moderate-risk criteria is consistent with limited  
23 existing evidence. A study linking English primary and secondary care records on 3.9 million  
24 people reported that 20% of population satisfied similar criteria<sup>20</sup>. Similarly, analysis of the  
25 Global Burden of Diseases Study estimated that 22% of the global population are at increased

1 risk of severe COVID-19 disease<sup>21</sup>. A USA study using data from the Behavioral Risk Factor  
2 Surveillance System reported that 45.4% of 444,649 adults had one or more of a longer list of  
3 morbidities that may be associated with higher risk from COVID-19<sup>22</sup>. Another USA study  
4 estimated that 14.2% of participants in the National Health Interview Survey had more than  
5 two-fold risk and 1.6% had more than 10-fold risk<sup>23</sup>.

6  
7 The evidence on COVID-19 related complications among those classified as high risk, and  
8 therefore advised to shield, has mainly come from case series and expert opinion. Case series  
9 found higher COVID-19 related complications among organ transplant recipients<sup>24,25</sup>,  
10 patients receiving chemotherapy, radiotherapy or immunotherapy for cancer<sup>26,27</sup>, and patients  
11 with haematological cancers<sup>28</sup>. Systematic review suggested higher COVID-19 complication  
12 risk among COPD patients, but the effect of COPD severity was not investigated<sup>29</sup>. Patients  
13 with cystic fibrosis and sickle cell disease were classified as high risk based on expert  
14 opinion<sup>30,31</sup>. While pregnant women with COVID-19 were found to have higher risk of poor  
15 maternal and perinatal outcomes<sup>32,33</sup>, outcomes were not investigated specifically for  
16 pregnant women with heart disease. There was no evidence of worse COVID-19 related  
17 complications among patients on immunosuppressants<sup>34</sup>. A large community study in  
18 England found strong association between severe asthma (hazard ratio 1.25) and COVID-19  
19 related mortality but did not investigate the risk of COVID-19 infection or hospitalisation<sup>9</sup>.

20  
21 In common with previous studies, we demonstrated that age was a major individual-level risk  
22 factor for death. Additionally, we showed it is important at the population level with 49.55%  
23 of deaths attributable to age  $\geq 70$  years. The higher mortality in the elderly was mediated in  
24 part by higher case-fatality but they also had a higher incidence of infection, possibly due to  
25 transmission within care homes. Lower ICU admissions following hospitalisation for

1 COVID-19 may have contributed to their higher case-fatality. Previous studies have reported  
2 that men are at higher risk of COVID-19.<sup>7</sup> Our study demonstrated they are less likely to be  
3 tested for COVID-19, have confirmed infection, and be hospitalised. They have comparable  
4 overall mortality from COVID-19, due to their lower incidence, but their case-fatality is  
5 higher.

6  
7 This study adds to the existing evidence of the possible effectiveness of a shielding strategy  
8 which is currently limited to mathematical modelling of population effects based on  
9 assumptions<sup>11-19</sup>. Ours was a large-scale, unselected general population study. The data  
10 cover a period when shielding was in place. Linkage of family practitioner, laboratory,  
11 hospital and death data enabled us to examine a range of COVID-19 outcomes and study a  
12 range of exposure variables including the overall risk categories and their individual criteria.  
13 The datasets were linked using exact, rather than probabilistic, matching. We were able to  
14 adjust for potential sociodemographic confounders. The exposure data were collected prior to  
15 the outcomes occurring avoiding potential reverse causation and recall or recording bias. Our  
16 analysis of potential risk factors was restricted to those used as criteria for shielding and  
17 moderate-risk at the time of the study. The shielding and moderate-risk criteria were correct  
18 at the time of extracting data but may be revised over time.

19  
20 Our findings suggest that our attempts to shield those at highest risk have not been as  
21 successful as hoped, with those advised to shield experiencing higher rates of infection and  
22 death. ICU demand did not exceed provision but due, in part, to those at highest risk of poor  
23 outcomes (prognosis) being less likely to be admitted to ICU rather than them being  
24 protected from infection. For shielding to be effective as a population level strategy, the  
25 current criteria would need to be expanded since three-quarters of deaths were associated

1 with moderate-risk criteria for which shielding has not hitherto been recommended. In our  
2 study, more than one-quarter of the general population would have needed to be effectively  
3 shielded to prevent over 80% of deaths. Since this is unlikely to be acceptable at a time when  
4 governments are under pressure to avoid further lock-downs, shielding is probably best  
5 viewed as an individual-level intervention to be used alongside other population-wide  
6 interventions such as physical distancing, face coverings and hand hygiene.

7

8

## 9 **Methods**

10

11 We conducted a general population cohort study of all 1.3 million residents of NHS GGC in  
12 the West of Scotland. The Community Health Index (CHI), a unique identifier attached to all  
13 Scottish health records, enabled individual-level record linkage of nine databases:  
14 Community Health Index (CHI) register, NHS GGC Shielding List, Egton Medical  
15 Information Systems (EMIS) and Vision, Electronic Communication of Surveillance in  
16 Scotland (ECOSS), Prescribing Information System (PIS), Strathclyde Electronic Renal  
17 Patient Record (SERPR), Rapid Preliminary Inpatient Data (RAPID), and death certificates.

18

19 The CHI register provided sociodemographic information (age, sex, area socioeconomic  
20 deprivation). Deprivation was measured using the Scottish Index of Multiple Deprivation  
21 (SIMD), derived from seven domains - income, education, health, employment, crime,  
22 housing, and access to services – and categorised into general population quintiles. ECOSS  
23 collects laboratory data on infectious diseases, including test date and result. Albasoft  
24 software extract data from the family practitioner electronic health record systems EMIS and  
25 Vision, and PIS collects data on medications prescribed by family practitioners. SERPR

1 records data on renal replacement therapy and transplantation. RAPID collects real-time data  
2 on hospitalisation, including dates of admission and discharge, and type of ward, and the  
3 Scottish Morbidity Record 01 (SMR01) subsequently records the relevant disease codes.  
4 Death certificates provide the date and cause of all deaths, whether in-hospital or in the  
5 community. Follow-up data were available until the end of May 2020, before the shielding  
6 recommendation was lifted.

7

8 Supplementary Table 1 lists the criteria for the shielded and medium risk categories applied  
9 at the time of data extraction. All remaining patients are categorised as low-risk. The Scottish  
10 list of high-risk individuals is compiled centrally, and regularly updated, using family  
11 practitioner, hospital admission, disease registry and medication data. Family practitioners  
12 check the completeness and accuracy of the list before letters, recommending shielding, are  
13 sent to patients. The NHS GGC Shielding List we used contains the validated data including  
14 the criterion satisfied. We ascertained moderate risk individuals using Albasoft extraction of  
15 EMIS and Vision data, and PIS data.

16

17 Separate models were conducted by overall risk category (low-risk, moderate-risk or  
18 shielded) and by the individual criteria for the moderate-risk and shielded categories. The  
19 four general population outcomes investigated were: confirmed COVID-19 infection;  
20 COVID-19 related hospitalisation; COVID-19 related ICU admission; COVID-19 related  
21 mortality. The three outcomes investigated among those with confirmed infection were:  
22 COVID-19 related hospitalisation; COVID-19 related ICU admission; and COVID-19 related  
23 case fatality.

24

1 Laboratory-confirmed cases were defined as positive PCR test. Clinically-confirmed cases  
2 were defined as either positive PCR test or death from COVID-19 without testing. COVID-  
3 19 related deaths were defined as International Classification of Diseases 10<sup>th</sup> revision (ICD-  
4 10) code U07.1 or U07.2 recorded on the death certificate. COVID-related hospitalisation  
5 was defined as an SMR01 hospitalisation record with an ICD code U07.1 or U07.2 or, for  
6 more recent admissions, a RAPID hospitalisation record plus positive PCR test taken  
7 between two weeks before and two days after hospitalisation. ICU admission during such  
8 hospitalisations was assumed to be COVID-related.

9

10 Sociodemographic characteristics were compared by risk category using chi-square tests.  
11 Poisson regression models with robust standard errors were used to compare risk ratios (RR)  
12 for the shielded and moderate-risk categories referent to the low-risk category. The models  
13 were run univariately; then adjusted for sex and SIMD quintile as potential confounders. Age  
14 was not included as a covariate because it was a moderate-risk criterion. The models were re-  
15 run using the individual criteria for the shielded and moderate-risk categories as the exposure  
16 variables, referent to the low-risk category.

17

18 Population attributable fractions (PAFs) were calculated, from prevalence and adjusted RR,  
19 to determine the proportion of each outcome that could be attributed to being shielded and  
20 moderate-risk, as well as the proportion due to each individual criterion. The PAFs of  
21 individual criteria were proportionally calibrated so that their sum equated to the overall PAF  
22 of the relevant risk category. PAF confidence intervals were estimated using bootstrapping (x  
23 1000).

24

25 Ethical approvals

1

2 The study was approved by the NHS GGC Primary Care Information Sharing Group and the  
3 NHS GGC Local Privacy Advisory Committee (Reference GSH/20RM005) and was covered  
4 by the generic Safe Haven Research Ethics Committee approval  
5 (GSH20RM005\_COVID\_Community).

6

7

## 1 References

- 2 1. Willan, J., King, A. J., Jeffery, K. & Bienz, N. Challenges for NHS hospitals during  
3 covid-19 epidemic. *BMJ* **368**, (2020).
- 4 2. ACAPS. #COVID19 A global joint response. (2020).
- 5 3. Swedish Civil Contingencies Agency (MSB). National ban on visiting elderly homes.  
6 (2020).
- 7 4. Radtke, T., Haile, S. R., Dressel, H. & Benden, C. Recommended shielding against  
8 COVID-19 impacts physical activity levels in adults with cystic fibrosis. *J. Cyst.*  
9 *Fibros.* (2020).
- 10 5. Kemp, O., Horne, G. A. & Soutar, R. The psychological impact of COVID19 on a  
11 shielding high-risk cohort. *Scott. Med. J.* 0036933020951900 (2020).
- 12 6. Public Health England. Guidance on shielding and protecting people who are clinically  
13 extremely vulnerable from COVID-19. (2020).
- 14 7. Lipsitch, M., Swerdlow, D. L. & Finelli, L. Defining the Epidemiology of Covid-19 —  
15 Studies Needed. *N. Engl. J. Med.* **382**, 1194–1196 (2020).
- 16 8. Lochlainn, M. N. *et al.* Key predictors of attending hospital with COVID19: An  
17 association study from the COVID Symptom Tracker App in 2,618,948 individuals.  
18 *medRxiv* 2020.04.25.20079251 (2020) doi:10.1101/2020.04.25.20079251.
- 19 9. The OpenSAFELY *et al.* OpenSAFELY: factors associated with COVID-19-related  
20 hospital death in the linked electronic health records of 17 million adult NHS patients.  
21 *medRxiv* 2020.05.06.20092999 (2020) doi:10.1101/2020.05.06.20092999.
- 22 10. Wynants, L. *et al.* Prediction models for diagnosis and prognosis of covid-19 infection:  
23 systematic review and critical appraisal. *BMJ* **369**, m1328 (2020).
- 24 11. Vlas, S. J. de & Coffeng, L. E. A phased lift of control: a practical strategy to achieve  
25 herd immunity against Covid-19 at the country level. *medRxiv* (2020)  
26 doi:10.1101/2020.03.29.20046011.
- 27 12. Keeling, M. J. *et al.* Predictions of COVID-19 dynamics in the UK: short-term  
28 forecasting and analysis of potential exit strategies. *medRxiv* (2020)  
29 doi:10.1101/2020.05.10.20083683.
- 30 13. McKeigue, P. M. & Colhoun, H. M. Evaluation of ‘stratify and shield’ as a policy  
31 option for ending the COVID-19 lockdown in the UK. *medRxiv* (2020)  
32 doi:10.1101/2020.04.25.20079913.
- 33 14. Bunnik, B. Van, Woolhouse, M. & van Bunnik, B. A. D. Segmentation and shielding  
34 of the most vulnerable members of the population as elements of an exit strategy from  
35 COVID-19 lockdown. *medrxiv* (2020) doi:10.1101/2020.05.04.20090597.
- 36 15. Weitz, J. S. *et al.* Intervention Serology and Interaction Substitution: Modeling the  
37 Role of ‘Shield Immunity’ in Reducing COVID-19 Epidemic Spread. *medRxiv* (2020)  
38 doi:10.1101/2020.04.01.20049767.
- 39 16. Neufeld, Z. & Khataee, H. Targeted adaptive isolation strategy for Covid-19  
40 pandemic. *medRxiv* (2020) doi:10.1101/2020.03.23.20041897.
- 41 17. Acemoglu, D., Chernozhukov, V., Werning, I. & Whinston, M. *Optimal Targeted*  
42 *Lockdowns in a Multi-Group SIR Model.* (2020) doi:10.3386/w27102.
- 43 18. Clark, A. *et al.* Global, regional, and national estimates of the population at increased  
44 risk of severe COVID-19 due to underlying health conditions in 2020: a modelling  
45 study. *Lancet Glob. Heal.* (2020) doi:10.1016/S2214-109X(20)30264-3.
- 46 19. Davies, N. G. *et al.* Effects of non-pharmaceutical interventions on COVID-19 cases,  
47 deaths, and demand for hospital services in the UK: a modelling study. *Lancet Public*  
48 *Heal.* (2020) doi:10.1016/S2468-2667(20)30133-X.
- 49 20. Banerjee, A. *et al.* Estimating excess 1-year mortality associated with the COVID-19



- 1 pandemic according to underlying conditions and age: a population-based cohort  
2 study. *Lancet* (2020) doi:10.1016/s0140-6736(20)30854-0.
- 3 21. Clark, A. *et al.* How many are at increased risk of severe COVID-19 disease? Rapid  
4 global, regional and national estimates for 2020. *medRxiv* (2020)  
5 doi:10.1101/2020.04.18.20064774.
- 6 22. Adams, M. L., Katz, D. L. & Grandpre, J. Population based estimates of comorbidities  
7 affecting risk for complications from COVID-19 in the US. *medRxiv* (2020)  
8 doi:10.1101/2020.03.30.20043919.
- 9 23. Jin, J., Agarwala, N., Kundu, P. & Chatterjee, N. Estimating the Size of High-risk  
10 Populations for COVID-19 Mortality across 442 US Cities. (2020)  
11 doi:10.1101/2020.05.27.20115170.
- 12 24. Pereira, M. *et al.* COVID-19 in Solid Organ Transplant Recipients: Initial Report From  
13 the US Epicenter. *Am. J. Transplant* (2020) doi:10.1111/AJT.15941.
- 14 25. Fernández-Ruiz, M. *et al.* COVID-19 in Solid Organ Transplant Recipients: A Single-  
15 Center Case Series From Spain. *Am. J. Transplant* (2020) doi:10.1111/AJT.15929.
- 16 26. Zhang, L. *et al.* Clinical Characteristics of COVID-19-infected Cancer Patients: A  
17 Retrospective Case Study in Three Hospitals Within Wuhan, China. *Ann. Oncol. Off.*  
18 *J. Eur. Soc. Med. Oncol.* (2020) doi:10.1016/J.ANNONC.2020.03.296.
- 19 27. Dai, M. *et al.* Patients with cancer appear more vulnerable to SARS-COV-2: a multi-  
20 center study during the COVID-19 outbreak. *Cancer Discov.* (2020)  
21 doi:10.1158/2159-8290.CD-20-0422.
- 22 28. He, W. *et al.* COVID-19 in persons with haematological cancers. *Leukemia* 1–9 (2020)  
23 doi:10.1038/s41375-020-0836-7.
- 24 29. Yang, J. *et al.* Prevalence of Comorbidities and Its Effects in Coronavirus Disease  
25 2019 Patients: A Systematic Review and Meta-Analysis. *Int. J. Infect. Dis.* **94**, (2020).
- 26 30. Colombo, C. *et al.* Impact of COVID-19 on people with cystic fibrosis. *Lancet Respir.*  
27 *Med.* **8**, e35–e36 (2020).
- 28 31. Rodriguez-Morales, A. *et al.* Clinical, Laboratory and Imaging Features of COVID-19:  
29 A Systematic Review and Meta-Analysis. *Travel Med. Infect. Dis.* (2020)  
30 doi:10.1016/J.TMAID.2020.101623.
- 31 32. Di Mascio, D. *et al.* Outcome of Coronavirus Spectrum Infections (SARS, MERS,  
32 COVID 1 -19) During Pregnancy: A Systematic Review and Meta-Analysis. *Am. J.*  
33 *Obstet. Gynecol. MFM* (2020) doi:10.1016/J.AJOGMF.2020.100107.
- 34 33. Elshafeey, F. *et al.* A Systematic Scoping Review of COVID-19 During Pregnancy  
35 and Childbirth. *Int. J. Gynaecol. Obstet.* (2020) doi:10.1002/IJGO.13182.
- 36 34. Minotti, C., Tirelli, F., Barbieri, E., Giaquinto, C. & D, D. How Is Immunosuppressive  
37 Status Affecting Children and Adults in SARS-CoV-2 Infection? A Systematic  
38 Review. *J. Infect.* **S0163-4453**, (2020).

40

## 1 **Acknowledgements**

2 We are extremely grateful to the following for their support and hard work in extracting and  
3 linking the datasets and providing access to them: Charlie Mayor (Data Safe Haven  
4 Manager), Alison Hamilton (Safe Haven Project Manager), Jonathan Todd (Head of  
5 Information Management), Imran Sadat (Data Manager) and Neil Hillen (Data Analyst).

## 7 **Contributors**

8 FH and BJ contributed equally and are joint-first authors. BJ and JP conceptualised the study,  
9 interpreted the data, and wrote the first draft of the manuscript. FH analysed the data and  
10 wrote the first draft of the manuscript. All other authors interpreted the data and critically  
11 revised the manuscript. All authors approved the final submitted version of the manuscript.  
12 BJ, FH, and JP serve as the guarantor of the manuscript and accepts full responsibility for the  
13 work and/or the conduct of the study, had access to the data, and controlled the decision to  
14 publish. The corresponding author attests that all listed authors meet authorship criteria and  
15 that no others meeting the criteria have been omitted.

## 17 **Conflicts of interest**

18 All authors have completed the ICMJE uniform disclosure form at  
19 [www.icmje.org/coi\\_disclosure.pdf](http://www.icmje.org/coi_disclosure.pdf) and declare: no support from any organisation for the  
20 submitted work; no financial relationships with any organisations that might have an interest  
21 in the submitted work in the previous three years; no other relationships or activities that  
22 could appear to have influenced the submitted work.

## 24 **Funding**

25 No external funding sources.

1 **Table 1.** COVID-19 testing status by sociodemographic characteristics, risk category and risk  
 2 criteria  
 3  
 4

|                                               | COVID-19 testing status            |                             | P value |
|-----------------------------------------------|------------------------------------|-----------------------------|---------|
|                                               | Not tested<br>N=1,299,206<br>n (%) | Tested<br>N=15,865<br>n (%) |         |
| Age group (years)                             |                                    |                             | <0.0001 |
| 0-24                                          | 355,238 (99.49)                    | 1,822 (0.51)                |         |
| 25-44                                         | 410,408 (99.22)                    | 3,247 (0.78)                |         |
| 45-64                                         | 340,268 (98.65)                    | 4,660 (1.35)                |         |
| ≥65                                           | 193,292 (96.92)                    | 6,136 (3.08)                |         |
| Sex                                           |                                    |                             | <0.0001 |
| Male                                          | 654,041 (99.01)                    | 6,569 (0.99)                |         |
| Female                                        | 645,165 (98.58)                    | 9,296 (1.42)                |         |
| Deprivation quintile                          |                                    |                             | <0.0001 |
| 1 (most deprived)                             | 461,672 (98.67)                    | 6,211 (1.33)                |         |
| 2                                             | 230,402 (98.75)                    | 2,921 (1.25)                |         |
| 3                                             | 194,702 (98.90)                    | 2,175 (1.10)                |         |
| 4                                             | 173,456 (98.93)                    | 1,883 (1.07)                |         |
| 5 (most affluent)                             | 238,974 (98.89)                    | 2,675 (1.11)                |         |
| Risk category                                 |                                    |                             | <0.0001 |
| Low                                           | 928,420 (99.27)                    | 6,819 (0.73)                |         |
| Moderate                                      | 345,913 (97.97)                    | 7,172 (2.03)                |         |
| Shielded                                      | 24,873 (92.99)                     | 1,874 (7.01)                |         |
| Moderate risk criteria                        |                                    |                             |         |
| Chronic respiratory disease                   | 149,325 (98.33)                    | 2,540 (1.67)                | <0.0001 |
| Heart disease                                 | 46,728 (96.21)                     | 1,843 (3.79)                | <0.0001 |
| Hypertension                                  | 156,286 (97.55)                    | 3,929 (2.45)                | <0.0001 |
| Diabetes                                      | 62,482 (97.09)                     | 1,876 (2.91)                | <0.0001 |
| Weakened immune system                        | 1,140 (95.40)                      | 55 (4.60)                   | <0.0001 |
| ≥70 years of age                              | 134,305 (96.23)                    | 5,263 (3.77)                | <0.0001 |
| Shielded criteria                             |                                    |                             |         |
| Severe respiratory disease                    | 17,146 (94.48)                     | 1,001 (5.52)                | <0.0001 |
| Specific cancers                              | 2,075 (83.30)                      | 416 (16.70)                 | <0.0001 |
| Pregnant with severe heart disease            | <5                                 | 0                           | -       |
| Immunosuppressive therapy                     | 5,028 (94.00)                      | 321 (6.00)                  | <0.0001 |
| Solid organ transplant                        | 1,149 (92.29)                      | 96 (7.71)                   | <0.0001 |
| Rare diseases and inborn errors of metabolism | 1,623 (91.95)                      | 142 (8.05)                  | <0.0001 |
| Renal dialysis                                | 305 (64.21)                        | 170 (35.79)                 | <0.0001 |

5  
 6 N number

**Table 2.** Crude, population-level COVID-19 outcomes by sociodemographic characteristics, risk category and risk criteria

|                                | Confirmed COVID-19 infection |                  |         | COVID-19 hospitalisation |                  |         | COVID-19 ICU admission |                |         | COVID-19 mortality   |                  |         |
|--------------------------------|------------------------------|------------------|---------|--------------------------|------------------|---------|------------------------|----------------|---------|----------------------|------------------|---------|
|                                | Negative test/<br>Not tested | Positive test    | P-value | Not admitted             | Admitted         | P-value | Not admitted           | Admitted       | P-value | Alive                | Dead             | P-value |
|                                | N=1,311,723<br>n (%)         | N=3,348<br>n (%) |         | N=1,313,410<br>n (%)     | N=1,661<br>n (%) |         | N=1,314,949<br>n (%)   | N=122<br>n (%) |         | N=1,314,044<br>n (%) | N=1,027<br>n (%) |         |
| Age group (years)              |                              |                  | <0.0001 |                          |                  | <0.0001 |                        |                | 0.0005  |                      |                  | <0.0001 |
| 0-24                           | 356,944 (99.97)              | 116 (0.03)       |         | 357,041 (99.99)          | 19 (0.01)        |         | 357,060 (100.00)       | 0              |         | 357,060 (100.00)     | 0 (0.00)         |         |
| 25-44                          | 413,123 (99.87)              | 532 (0.13)       |         | 413,532 (99.97)          | 123 (0.03)       |         | 413,643 (100.00)       | 12 (0.00)      |         | 413,647 (100.00)     | 8 (0.00)         |         |
| 45-64                          | 343,856 (99.69)              | 1,072 (0.31)     |         | 344,409 (99.85)          | 519 (0.15)       |         | 344,846 (99.98)        | 82 (0.02)      |         | 344,838 (99.97)      | 90 (0.03)        |         |
| ≥65                            | 197,800 (99.18)              | 1,628 (0.82)     |         | 198,428 (99.50)          | 1,000 (0.50)     |         | 199,400 (99.99)        | 28 (0.01)      |         | 198,499 (99.53)      | 929 (0.47)       |         |
| Sex                            |                              |                  | <0.0001 |                          |                  | 0.81    |                        |                | <0.0001 |                      |                  | 0.0001  |
| Male                           | 659,203 (99.79)              | 1,407 (0.21)     |         | 659,781 (99.87)          | 829 (0.13)       |         | 660,525 (99.99)        | 85 (0.01)      |         | 660,092 (99.92)      | 518 (0.08)       |         |
| Female                         | 652,250 (99.70)              | 1,941 (0.30)     |         | 659,369 (99.87)          | 832 (0.13)       |         | 660,908 (99.99)        | 37 (0.01)      |         | 653,952 (99.92)      | 509 (0.08)       |         |
| Deprivation quintile           |                              |                  | 0.0002  |                          |                  | <0.0001 |                        |                | 0.18    |                      |                  | <0.0001 |
| 1 (most deprived)              | 466,582 (99.72)              | 1,301 (0.28)     |         | 467,146 (99.84)          | 737 (0.16)       |         | 467,832 (99.99)        | 51 (0.01)      |         | 467,442 (99.91)      | 441 (0.09)       |         |
| 2                              | 232,710 (99.74)              | 613 (0.26)       |         | 233,041 (99.88)          | 282 (0.12)       |         | 233,302 (99.99)        | 21 (0.01)      |         | 233,181 (99.94)      | 142 (0.06)       |         |
| 3                              | 196,416 (99.77)              | 461 (0.23)       |         | 196,651 (99.89)          | 226 (0.11)       |         | 196,854 (99.99)        | 23 (0.01)      |         | 196,724 (99.92)      | 153 (0.08)       |         |
| 4                              | 174,939 (99.77)              | 400 (0.23)       |         | 175,143 (99.89)          | 196 (0.11)       |         | 175,329 (99.99)        | 10 (0.01)      |         | 175,209 (99.93)      | 130 (0.07)       |         |
| 5 (most affluent)              | 241,076 (99.76)              | 573 (0.24)       |         | 241,429 (99.91)          | 220 (0.09)       |         | 241,632 (99.99)        | 17 (0.01)      |         | 241,488 (99.93)      | 161 (0.07)       |         |
| Risk category                  |                              |                  | <0.0001 |                          |                  | <0.0001 |                        |                | <0.0001 |                      |                  | <0.0001 |
| Low                            | 934,049 (99.87)              | 1,190 (0.13)     |         | 93,4839 (99.96)          | 400 (0.04)       |         | 935,174 (99.99)        | 65 (0.01)      |         | 935,155 (99.99)      | 84 (0.01)        |         |
| Moderate                       | 351,226 (99.47)              | 1,859 (0.53)     |         | 35,2054 (99.71)          | 1,031 (0.29)     |         | 353,033 (99.99)        | 52 (0.01)      |         | 352,282 (99.77)      | 803 (0.23)       |         |
| Shielded                       | 26,448 (98.88)               | 299 (1.12)       |         | 26,517 (99.14)           | 230 (0.86)       |         | 26,742 (99.98)         | 5 (0.02)       |         | 26,607 (99.48)       | 140 (0.52)       |         |
| Moderate risk criteria         |                              |                  |         |                          |                  |         |                        |                |         |                      |                  |         |
| Chronic respiratory disease    | 151,414 (99.70)              | 451 (0.30)       | 0.0005  | 151,618 (99.84)          | 247 (0.16)       | <0.0001 | 151,853 (99.99)        | 12 (0.01)      | 0.65    | 151,812 (99.97)      | 53 (0.03)        | <0.0001 |
| Heart disease                  | 48,176 (99.19)               | 395 (0.81)       | <0.0001 | 48,325 (99.49)           | 246 (0.51)       | <0.0001 | 48,564 (99.99)         | 7 (0.01)       | 0.34    | 48,456 (99.76)       | 115 (0.24)       | <0.0001 |
| Hypertension                   | 159,267 (99.41)              | 948 (0.59)       | <0.0001 | 159,670 (99.66)          | 545 (0.34)       | <0.0001 | 160,189 (99.98)        | 26 (0.02)      | 0.003   | 159,991 (99.86)      | 224 (0.14)       | <0.0001 |
| Diabetes                       | 63,903 (99.29)               | 455 (0.71)       | <0.0001 | 64,063 (99.54)           | 295 (0.46)       | <0.0001 | 64,335 (99.96)         | 23 (0.04)      | <0.0001 | 64,263 (99.85)       | 95 (0.15)        | <0.0001 |
| Weakened immune system         | 1,183 (99.00)                | 12 (1.00)        | <0.0001 | 1,185 (99.16)            | 10 (0.84)        | <0.0001 | 1,195 (100.00)         | 0 (0.00)       | -       | 1,189 (99.50)        | 6 (0.50)         | <0.0001 |
| ≥70 years of age               | 138,115 (98.96)              | 1,453 (1.04)     | <0.0001 | 138,701 (99.38)          | 867 (0.62)       | <0.0001 | 139,560 (99.99)        | 8 (0.01)       | 0.19    | 138,690 (99.37)      | 878 (0.63)       | <0.0001 |
| Shielded group                 |                              |                  |         |                          |                  |         |                        |                |         |                      |                  |         |
| Severe respiratory disease     | 17,981 (99.09)               | 166 (0.91)       | <0.0001 | 18,012 (99.26)           | 135 (0.74)       | <0.0001 | 18,146 (99.99)         | <5             | -       | 18,059 (99.52)       | 88 (0.48)        | <0.0001 |
| Specific cancers               | 2,452 (98.43)                | 39 (1.57)        | <0.0001 | 2,462 (98.84)            | 29 (1.16)        | <0.0001 | 2,491 (100.00)         | 0              | -       | 2,475 (99.36)        | 16 (0.64)        | <0.0001 |
| Pregnant, severe heart disease | <5                           | 0                | -       | <5                       | 0                | -       | <5                     | 0              | -       | <5                   | 0 (0.00)         | -       |
| Immunosuppressive therapy      | 5,285 (98.80)                | 64 (1.20)        | <0.0001 | 5,299 (99.07)            | 50 (0.93)        | <0.0001 | 5,346 (99.94)          | <5             | -       | 5,324 (99.53)        | 25 (0.47)        | <0.0001 |
| Solid organ transplant         | 1,228 (98.63)                | 17 (1.37)        | <0.0001 | 1,230 (98.80)            | 15 (1.20)        | <0.0001 | 1,244 (99.92)          | <5             | -       | 1,238 (99.44)        | 7 (0.56)         | <0.0001 |
| Rare diseases and IEM          | 1,729 (97.96)                | 36 (2.04)        | <0.0001 | 1,741 (98.64)            | 24 (1.36)        | <0.0001 | 1,764 (99.94)          | <5             | -       | 1,744 (98.81)        | 21 (1.19)        | <0.0001 |
| Renal dialysis                 | 445 (93.68)                  | 30 (6.32)        | <0.0001 | 457 (96.21)              | 18 (3.79)        | <0.0001 | 475 (100.00)           | 0 (0.00)       | -       | 468 (98.53)          | 7 (1.47)         | <0.0001 |

N number; IEM inborn errors of metabolism

**Table 3.** Associations\* between risk categories and risk criteria and population-level COVID-19 outcomes

|                             | Confirmed COVID-19 infection |         | COVID-19 hospitalisation |         | COVID-19 ICU admission |         | COVID-19 mortality    |         |
|-----------------------------|------------------------------|---------|--------------------------|---------|------------------------|---------|-----------------------|---------|
|                             | RR (95% CI)                  | P-value | RR (95% CI)              | P-value | RR (95% CI)            | P-value | RR (95% CI)           | P-value |
| <b>Low</b>                  | 1 (Reference)                |         | 1 (Reference)            |         | 1 (Reference)          |         | 1 (Reference)         |         |
| <b>Moderate</b>             |                              |         |                          |         |                        |         |                       |         |
| <i>Overall</i>              | 4.11 (3.83-4.42)             | <0.0001 | 6.83 (6.09-7.67)         | <0.0001 | 2.15 (1.49-3.10)       | <0.0001 | 25.41 (20.36-31.71)   | <0.0001 |
| Chronic respiratory disease | 2.30 (2.07-2.56)             | <0.0001 | 3.76 (3.21-4.41)         | <0.0001 | 1.15 (0.62-2.14)       | 0.65    | 3.88 (2.77-5.44)      | <0.0001 |
| Heart disease               | 6.53 (5.83-7.31)             | <0.0001 | 11.63 (9.93-13.63)       | <0.0001 | 1.92 (0.88-4.20)       | 0.1     | 26.00 (19.71-34.31)   | <0.0001 |
| Hypertension                | 4.60 (4.22-5.01)             | <0.0001 | 8.01 (7.04-9.11)         | <0.0001 | 2.44 (1.55-3.85)       | 0.0001  | 15.68 (12.24-20.09)   | <0.0001 |
| Diabetes                    | 5.59 (5.02-6.23)             | <0.0001 | 10.49 (9.03-12.19)       | <0.0001 | 4.89 (3.03-7.89)       | <0.0001 | 16.23 (12.16-21.66)   | <0.0001 |
| Weakened immune system      | 7.79 (4.43-13.72)            | <0.0001 | 19.62 (10.50-36.69)      | <0.0001 | -                      | -       | 56.19 (24.85-127.02)  | <0.0001 |
| ≥70 years of age            | 8.08 (7.48-8.72)             | <0.0001 | 14.96 (13.29-16.85)      | <0.0001 | 0.90 (0.43-1.86)       | 0.77    | 72.98 (58.81-90.55)   | <0.0001 |
| <b>Shielded</b>             |                              |         |                          |         |                        |         |                       |         |
| <i>Overall</i>              | 8.45 (7.44-9.59)             | <0.0001 | 19.35 (16.45-22.77)      | <0.0001 | 2.78 (1.12-6.91)       | 0.03    | 57.56 (44.06-75.19)   | <0.0001 |
| Severe respiratory disease  | 6.79 (5.78-7.99)             | <0.0001 | 16.40 (13.48-19.95)      | <0.0001 | 0.82 (0.11-5.89)       | 0.84    | 52.85 (39.31-71.05)   | <0.0001 |
| Specific cancers            | 12.13 (8.83-16.65)           | <0.0001 | 27.21 (18.69-39.63)      | <0.0001 | -                      | -       | 71.72 (42.36-121.42)  | <0.0001 |
| Immunosuppressive therapy   | 9.25 (7.21-11.88)            | <0.0001 | 21.85 (16.30-29.29)      | <0.0001 | 8.40 (2.64-26.72)      | 0.0003  | 52.23 (33.64-81.08)   | <0.0001 |
| Solid organ transplant      | 10.90 (6.77-17.55)           | <0.0001 | 27.77 (16.61-46.44)      | <0.0001 | 10.84 (1.50-78.16)     | 0.02    | 62.03 (29.03-132.56)  | <0.0001 |
| Rare diseases and IEM       | 15.91 (11.44-22.12)          | <0.0001 | 31.45 (20.86-47.42)      | <0.0001 | 8.18 (1.13-58.93)      | 0.04    | 132.29 (82.60-211.86) | <0.0001 |
| Renal dialysis              | 50.29 (35.06-72.12)          | <0.0001 | 84.41 (52.70-135.20)     | <0.0001 | -                      | -       | 158.41 (74.11-338.62) | <0.0001 |

\*adjusted for sex and deprivation quintile

RR relative risk; CI confidence interval; IEM inborn errors of metabolism

s

**Table 4.** Crude COVID-19 outcomes among confirmed cases by sociodemographic characteristics, risk category and risk criteria

|                                | COVID-19 hospitalisation<br>N=3,348 <sup>†</sup> |                              |         | COVID-19 ICU admission<br>N=3,348 <sup>†</sup> |                            |         | COVID-19 case-fatality<br>N=3,846 <sup>‡</sup> |                          |         |
|--------------------------------|--------------------------------------------------|------------------------------|---------|------------------------------------------------|----------------------------|---------|------------------------------------------------|--------------------------|---------|
|                                | Not admitted<br>N=1,687<br>n (%)                 | Admitted<br>N=1,661<br>n (%) | P-value | Not admitted<br>N=3,226<br>n (%)               | Admitted<br>N=122<br>n (%) | P-value | Alive<br>N=2,819<br>n (%)                      | Dead<br>N=1,027<br>n (%) | P-value |
| Age group (years)              |                                                  |                              | <0.0001 |                                                |                            | <0.0001 |                                                |                          | <0.0001 |
| 0-24                           | 97 (83.62)                                       | 19 (16.38)                   |         | 116 (100.00)                                   | 0                          |         | 116 (100.00)                                   | 0 (0.00)                 |         |
| 25-44                          | 410 (76.92)                                      | 123 (23.08)                  |         | 520 (97.74)                                    | 12 (2.26)                  |         | 526 (98.50)                                    | 8 (1.50)                 |         |
| 45-64                          | 553 (51.59)                                      | 519 (48.41)                  |         | 990 (92.35)                                    | 82 (7.65)                  |         | 1,003 (91.77)                                  | 90 (8.23)                |         |
| ≥65                            | 630 (38.65)                                      | 1,000 (61.35)                |         | 1,600 (98.28)                                  | 28 (1.72)                  |         | 1,174 (55.83)                                  | 929 (44.17)              |         |
| Sex                            |                                                  |                              |         |                                                |                            |         |                                                |                          | <0.0001 |
| Male                           | 579 (41.12)                                      | 829 (58.88)                  | <0.0001 | 1,322 (93.96)                                  | 85 (6.04)                  | <0.0001 | 1,105 (68.08)                                  | 518 (31.92)              |         |
| Female                         | 1,108 (57.11)                                    | 832 (42.89)                  |         | 1,904 (98.09)                                  | 37 (1.91)                  |         | 1,717 (77.10)                                  | 509 (22.90)              |         |
| Deprivation Quintile           |                                                  |                              | <0.0001 |                                                |                            | 0.29    |                                                |                          | 0.0004  |
| 1 (most deprived)              | 566 (43.44)                                      | 737 (56.56)                  |         | 1,250 (96.08)                                  | 51 (3.92)                  |         | 1,046 (70.34)                                  | 441 (29.66)              |         |
| 2                              | 332 (54.07)                                      | 282 (45.93)                  |         | 592 (96.57)                                    | 21 (3.43)                  |         | 531 (78.90)                                    | 142 (21.10)              |         |
| 3                              | 235 (50.98)                                      | 226 (49.02)                  |         | 438 (95.01)                                    | 23 (4.99)                  |         | 394 (72.03)                                    | 153 (27.97)              |         |
| 4                              | 204 (51.00)                                      | 196 (49.00)                  |         | 390 (97.50)                                    | 10 (2.50)                  |         | 341 (72.40)                                    | 130 (27.60)              |         |
| 5 (most affluent)              | 353 (61.61)                                      | 220 (38.39)                  |         | 556 (97.03)                                    | 17 (2.97)                  |         | 507 (75.90)                                    | 161 (24.10)              |         |
| Risk category                  |                                                  |                              | <0.0001 |                                                |                            | 0.0001  |                                                |                          | <0.0001 |
| Low                            | 791 (66.41)                                      | 400 (33.59)                  |         | 1,125 (94.54)                                  | 65 (5.46)                  |         | 1,130 (93.08)                                  | 84 (6.92)                |         |
| Moderate                       | 828 (44.54)                                      | 1,031 (55.46)                |         | 1,807 (97.20)                                  | 52 (2.80)                  |         | 1,485 (64.90)                                  | 803 (35.10)              |         |
| Shielded                       | 71 (23.59)                                       | 230 (76.41)                  |         | 294 (98.33)                                    | 5 (1.67)                   |         | 204 (59.30)                                    | 140 (40.70)              |         |
| Moderate risk criteria         |                                                  |                              |         |                                                |                            |         |                                                |                          |         |
| Chronic respiratory disease    | 205 (45.35)                                      | 247 (54.65)                  | 0.02    | 439 (97.34)                                    | 12 (2.66)                  | 0.29    | 420 (88.79)                                    | 53 (11.21)               | <0.0001 |
| Heart disease                  | 149 (37.72)                                      | 246 (62.28)                  | <0.0001 | 388 (98.23)                                    | 7 (1.77)                   | 0.049   | 330 (74.16)                                    | 115 (25.84)              | 0.7     |
| Hypertension                   | 404 (42.57)                                      | 545 (57.43)                  | <0.0001 | 922 (97.26)                                    | 26 (2.74)                  | 0.10    | 836 (78.87)                                    | 224 (21.13)              | <0.0001 |
| Diabetes                       | 161 (35.31)                                      | 295 (64.69)                  | <0.0001 | 432 (94.95)                                    | 23 (5.05)                  | 0.11    | 398 (80.73)                                    | 95 (19.27)               | <0.0001 |
| Weakened immune system         | 2 (16.67)                                        | 10 (83.33)                   | 0.04    | 12 (100.00)                                    | 0                          | -       | 6 (50.00)                                      | 6 (50.00)                | 0.13    |
| ≥70 years of age               | 587 (40.37)                                      | 867 (59.63)                  | <0.0001 | 1,445 (99.45)                                  | 8 (0.55)                   | <0.0001 | 1,035 (54.10)                                  | 878 (45.90)              | <0.0001 |
| Shielding criteria             |                                                  |                              |         |                                                |                            |         |                                                |                          |         |
| Severe respiratory disease     | 33 (19.64)                                       | 135 (80.36)                  | <0.0001 | 165 (99.40)                                    | <5                         | -       | 111 (55.78)                                    | 88 (44.22)               | <0.0001 |
| Specific cancers               | 10 (25.64)                                       | 29 (74.36)                   | 0.003   | 39 (100.00)                                    | 0                          | -       | 27 (62.79)                                     | 16 (37.21)               | 0.16    |
| Pregnant, severe heart disease | -                                                | -                            | -       | -                                              | -                          | -       | -                                              | -                        | -       |
| Immunosuppressive therapy      | 14 (21.88)                                       | 50 (78.12)                   | <0.0001 | 61 (95.31)                                     | <5                         | -       | 42 (62.69)                                     | 25 (37.31)               | 0.07    |
| Solid organ transplant         | 2 (11.76)                                        | 15 (88.24)                   | 0.003   | 16 (94.12)                                     | <5                         | -       | 11 (61.11)                                     | 7 (38.89)                | 0.37    |
| Rare diseases and IEM          | 12 (33.33)                                       | 24 (66.67)                   | 0.06    | 35 (97.22)                                     | <5                         | -       | 23 (52.27)                                     | 21 (47.73)               | 0.003   |
| Renal dialysis                 | 12 (40.00)                                       | 18 (60.00)                   | 0.33    | 30 (100.00)                                    | 0                          | -       | 23 (76.67)                                     | 7 (23.33)                | 0.83    |

<sup>†</sup>laboratory-confirmed (test-positive) COVID-19 cases

<sup>‡</sup>clinically-confirmed (test-positive or COVID-19 on death certificate) COVID-19 cases

N number; IEM inborn errors of metabolism

**Table 5.** Associations\* between risk categories and risk criteria and COVID-19 outcomes among confirmed cases

|                             | COVID-19 hospitalisation<br>N=3,348 <sup>†</sup> |         | COVID-19 ICU admission<br>N=3,348 <sup>†</sup> |         | COVID-19 case-fatality<br>N=3,846 <sup>‡</sup> |         |
|-----------------------------|--------------------------------------------------|---------|------------------------------------------------|---------|------------------------------------------------|---------|
|                             | RR (95% CI)                                      | P-value | RR (95% CI)                                    | P-value | RR (95% CI)                                    | P-value |
| <b>Low</b>                  | 1 (Reference)                                    |         | 1 (Reference)                                  |         | 1 (Reference)                                  |         |
| <b>Moderate</b>             |                                                  |         |                                                |         |                                                |         |
| Overall                     | 1.34 (1.23-1.46)                                 | <0.0001 | 0.40 (0.28-0.58)                               | <0.0001 | 5.01 (4.14-6.06)                               | <0.0001 |
| Chronic respiratory disease | 1.55 (1.38-1.75)                                 | <0.0001 | 0.46 (0.25-0.86)                               | 0.02    | 1.61 (1.21-2.16)                               | 0.001   |
| Heart disease               | 1.59 (1.41-1.79)                                 | <0.0001 | 0.24 (0.11-0.53)                               | 0.0004  | 3.55 (2.79-4.50)                               | <0.0001 |
| Hypertension                | 1.53 (1.39-1.69)                                 | <0.0001 | 0.44 (0.28-0.70)                               | 0.0004  | 3.04 (2.45-3.76)                               | <0.0001 |
| Diabetes                    | 1.69 (1.51-1.90)                                 | <0.0001 | 0.72 (0.45-1.17)                               | 0.19    | 2.62 (2.05-3.36)                               | <0.0001 |
| Weakened immune system      | 2.41 (1.50-3.86)                                 | 0.0003  | -                                              | -       | 7.09 (3.52-14.28)                              | <0.0001 |
| ≥70 years of age            | 1.36 (1.24-1.48)                                 | <0.0001 | 0.07 (0.04-0.15)                               | <0.0001 | 6.53 (5.42-7.88)                               | <0.0001 |
| <b>Shielded</b>             |                                                  |         |                                                |         |                                                |         |
| Overall                     | 1.89 (1.67-2.13)                                 | <0.0001 | 0.23 (0.09-0.56)                               | 0.001   | 5.62 (4.47-7.07)                               | <0.0001 |
| Severe respiratory disease  | 1.92 (1.66-2.23)                                 | <0.0001 | -                                              | -       | 6.16 (4.78-7.93)                               | <0.0001 |
| Specific cancers            | 1.88 (1.41-2.49)                                 | <0.0001 | -                                              | -       | 5.00 (3.18-7.87)                               | <0.0001 |
| Immunosuppressive therapy   | 2.15 (1.73-2.69)                                 | <0.0001 | -                                              | -       | 5.15 (3.53-7.51)                               | <0.0001 |
| Solid organ transplant      | 2.31 (1.57-3.41)                                 | <0.0001 | -                                              | -       | 5.20 (2.71-9.99)                               | <0.0001 |
| Rare diseases and IEM       | 1.49 (1.09-2.03)                                 | 0.01    | -                                              | -       | 6.59 (4.39-9.89)                               | <0.0001 |
| Renal dialysis              | 1.61 (1.13-2.30)                                 | 0.009   | -                                              | -       | 3.10 (1.61-5.96)                               | 0.0007  |

\*adjusted for sex and deprivation quintile

<sup>†</sup>laboratory-confirmed (test-positive) COVID-19 cases

<sup>‡</sup>clinically-confirmed (test-positive or COVID-19 on death certificate) COVID-19 cases

N number; RR relative risk; CI confidence interval; IEM inborn errors of metabolism
